# Supplementary material for: A rapid simple point-of-care assay for the detection of SARS-CoV-2 neutralizing antibodies
Source: PubMed Central journal article supplement (PMC9053278; doi:10.1038/s43856-021-00045-9), 2021-11-11
Supplement: 43856_2021_45_MOESM3_ESM.pdf [file 43856_2021_45_MOESM3_ESM.pdf]

## **Description of Additional Supplementary Files**

**File Name:** Supplementary Data 1

**Description:** Source data for Fig 2C, Fig 3A-E and Fig 4A-F
